# Supplementary material for: Modification of Gold Zeolitic Supports for Catalytic Oxidation of Glucose to Gluconic Acid
Source: MDPI journal article supplement (doi:10.3390/ma14185250), 2021-09-13
Supplement: s1 [file s1]

# Supplementary Materials

*for Materials*

## Modification of gold zeolitic supports for catalytic

### oxidation of glucose to gluconic acid

Adrian Walkowiak\*, Joanna Wolska\*, Anna Wojtaszek-Gurdak, Izabela Sobczak,

Lukasz Wolski, Maria Ziolk

*Adam Mickiewicz University, Poznań, Faculty of Chemistry, Uniwersytetu Poznańskiego 8,*

*61-614 Poznań, Poland*

*\* corresponding author*

*e-mail: [adrian.walkowiak@amu.edu.pl](mailto:adrian.walkowiak@amu.edu.pl) (A.W.) ; [j.wolska@amu.edu.pl](mailto:j.wolska@amu.edu.pl) (J.W.)*

List of content:

**Figure S1.**  $^{11}\text{B}$  MAS NMR spectrum of B/MCM-36 sample.

**Figure S2.** FTIR spectra after (a) adsorption of pyridine at 150 °C and desorption at (b) 150 °C, (c) 200 °C, (d) 250 °C, (e) 300 °C. All the spectra were obtained by subtraction the spectrum after activation and normalized to the density of a wafer of ca 10 mg cm<sup>-2</sup>.

**Figure S3.** Representative TEM image of Au/HBeta showing Au NPs localization on the external surface of the zeolite.

**Figure S4.** ATR-FTIR spectra of selected materials before and after glucose solution treatment and drying at 80°C.

**Figure S5.** N 1s region of XP spectra of gold-containing zeolites for (A) HBeta; (B) MCM-36 series. The regions of BE values typical to the protonated and non-protonated amine groups are marked in yellow and blue, respectively.

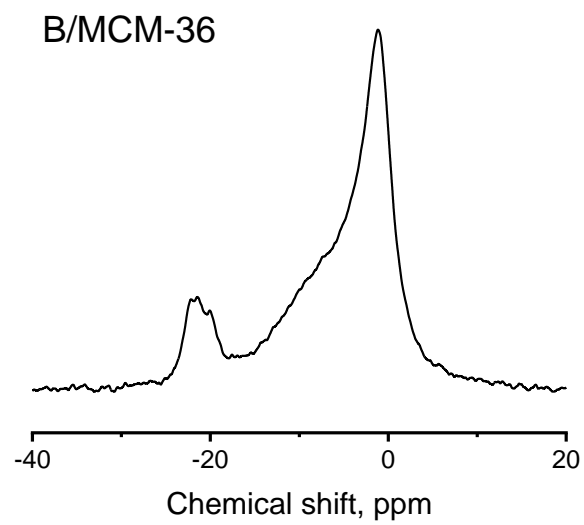

**Figure S1.**  $^{11}\text{B}$  MAS NMR spectrum of B/MCM-36 sample.

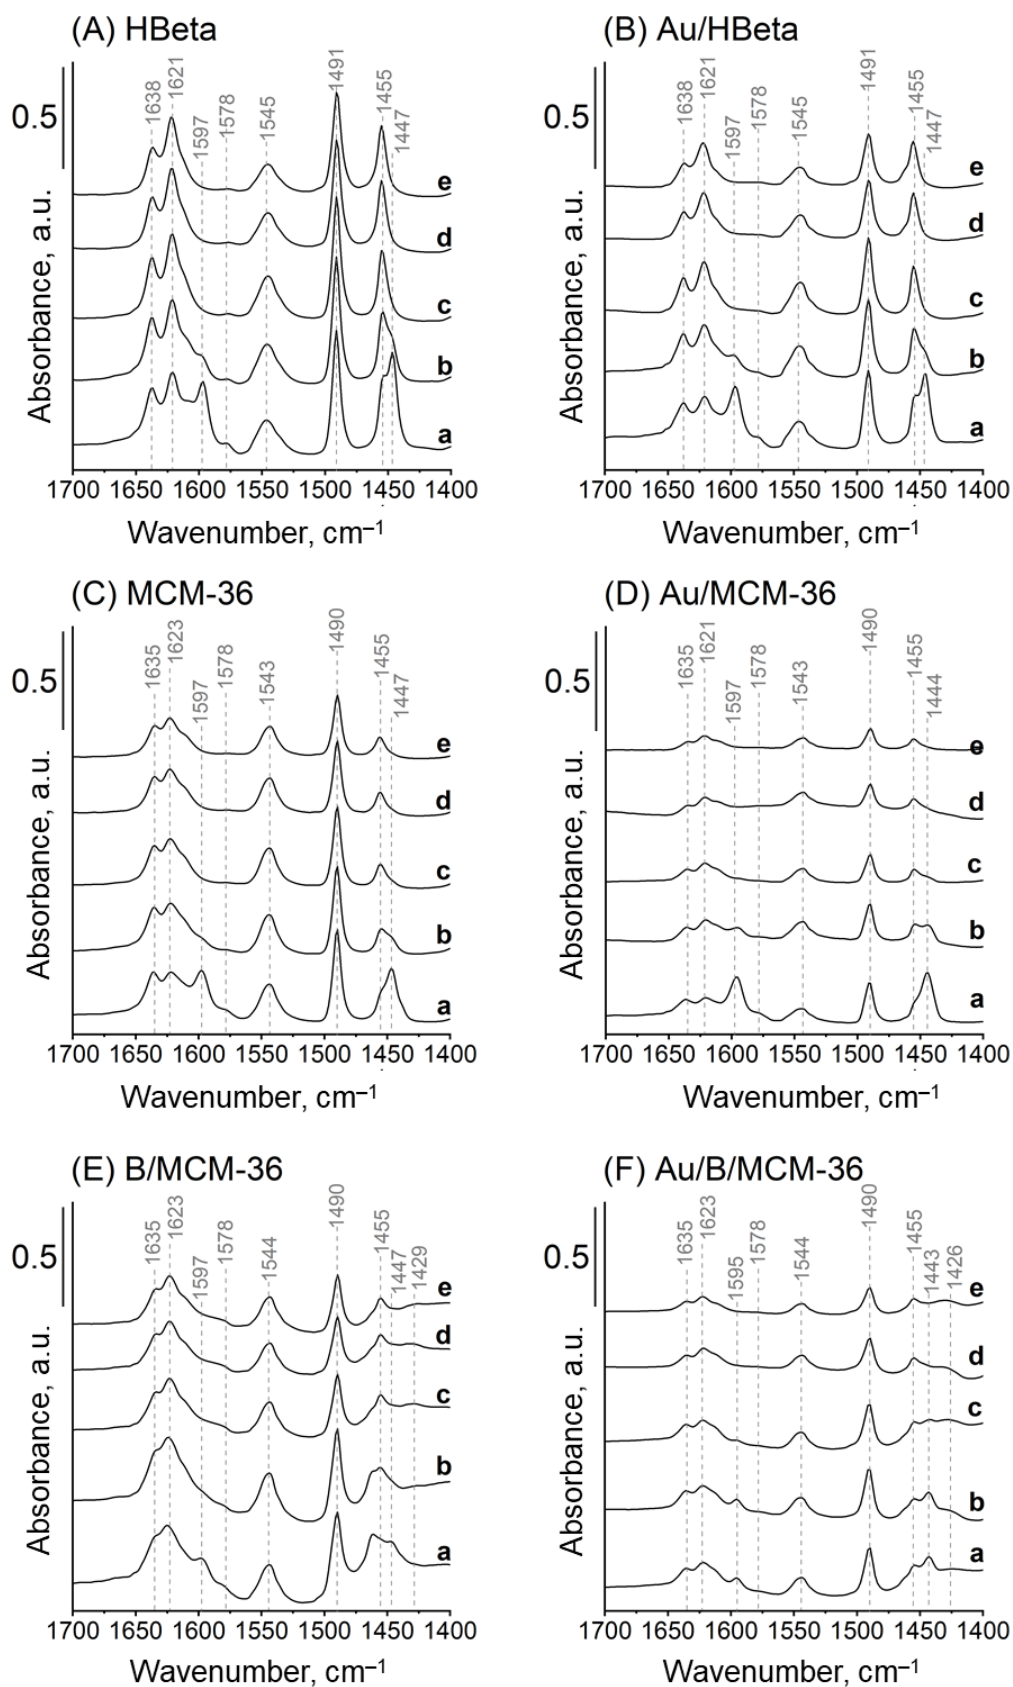

**Figure S2.** FTIR spectra after (a) adsorption of pyridine at 150 °C and desorption at (b) 150 °C, (c) 200 °C, (d) 250 °C, (e) 300 °C. All the spectra were obtained by subtraction the spectrum after activation and normalized to the density of a wafer of  $10 \text{ mg cm}^{-2}$ .

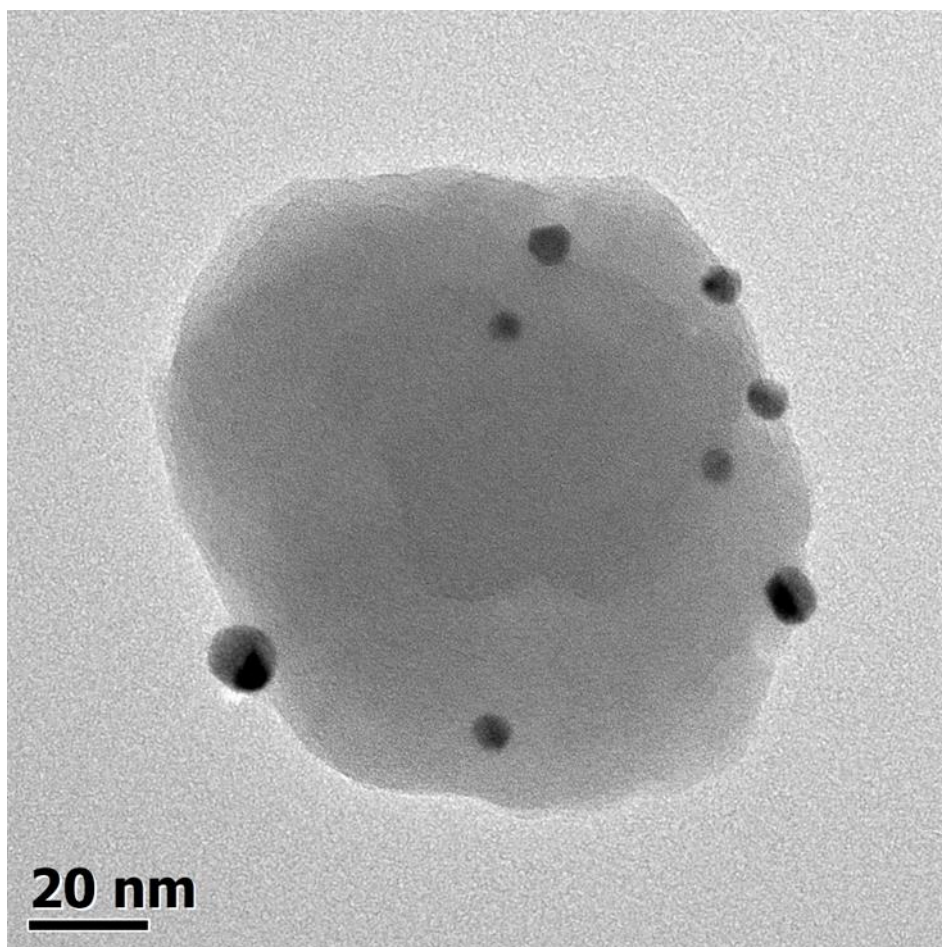

**Figure S3.** Representative TEM image of Au/HBeta showing Au NPs localization on the external surface of the zeolite grain.

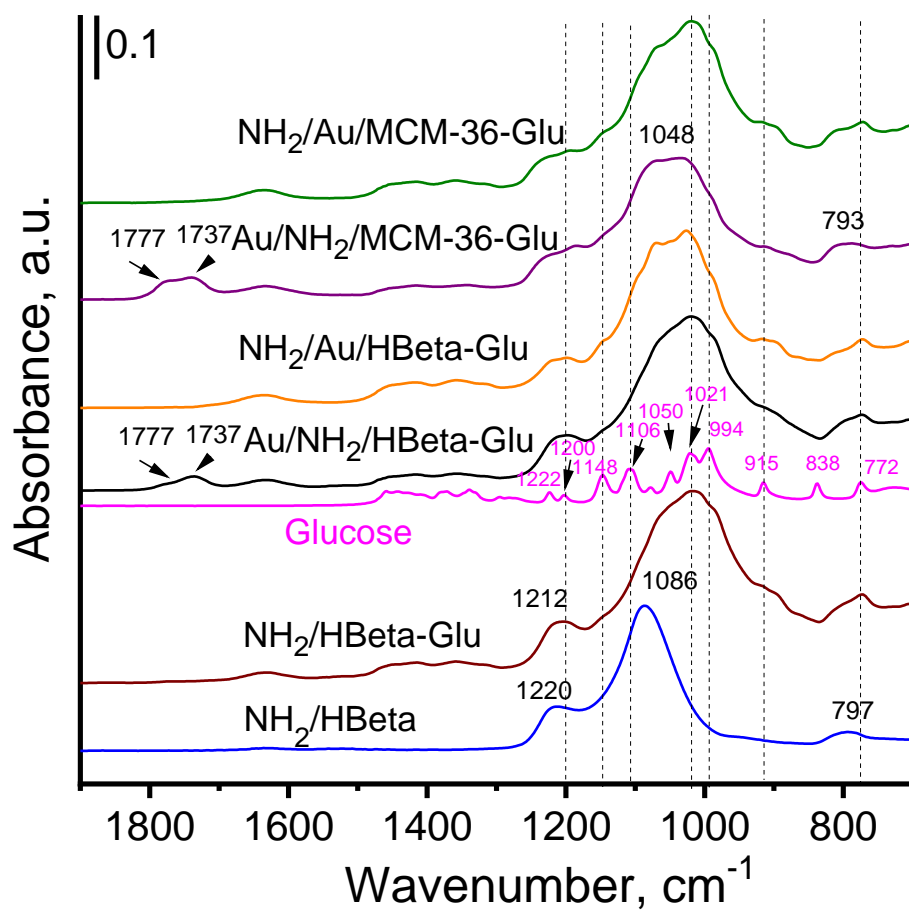

**Figure S4.** ATR-FTIR spectra of selected materials before and after glucose solution treatment and drying at 80°C.

Adnotation: "-Glu" in the catalyst symbol means sample after glucose adsorption and drying.

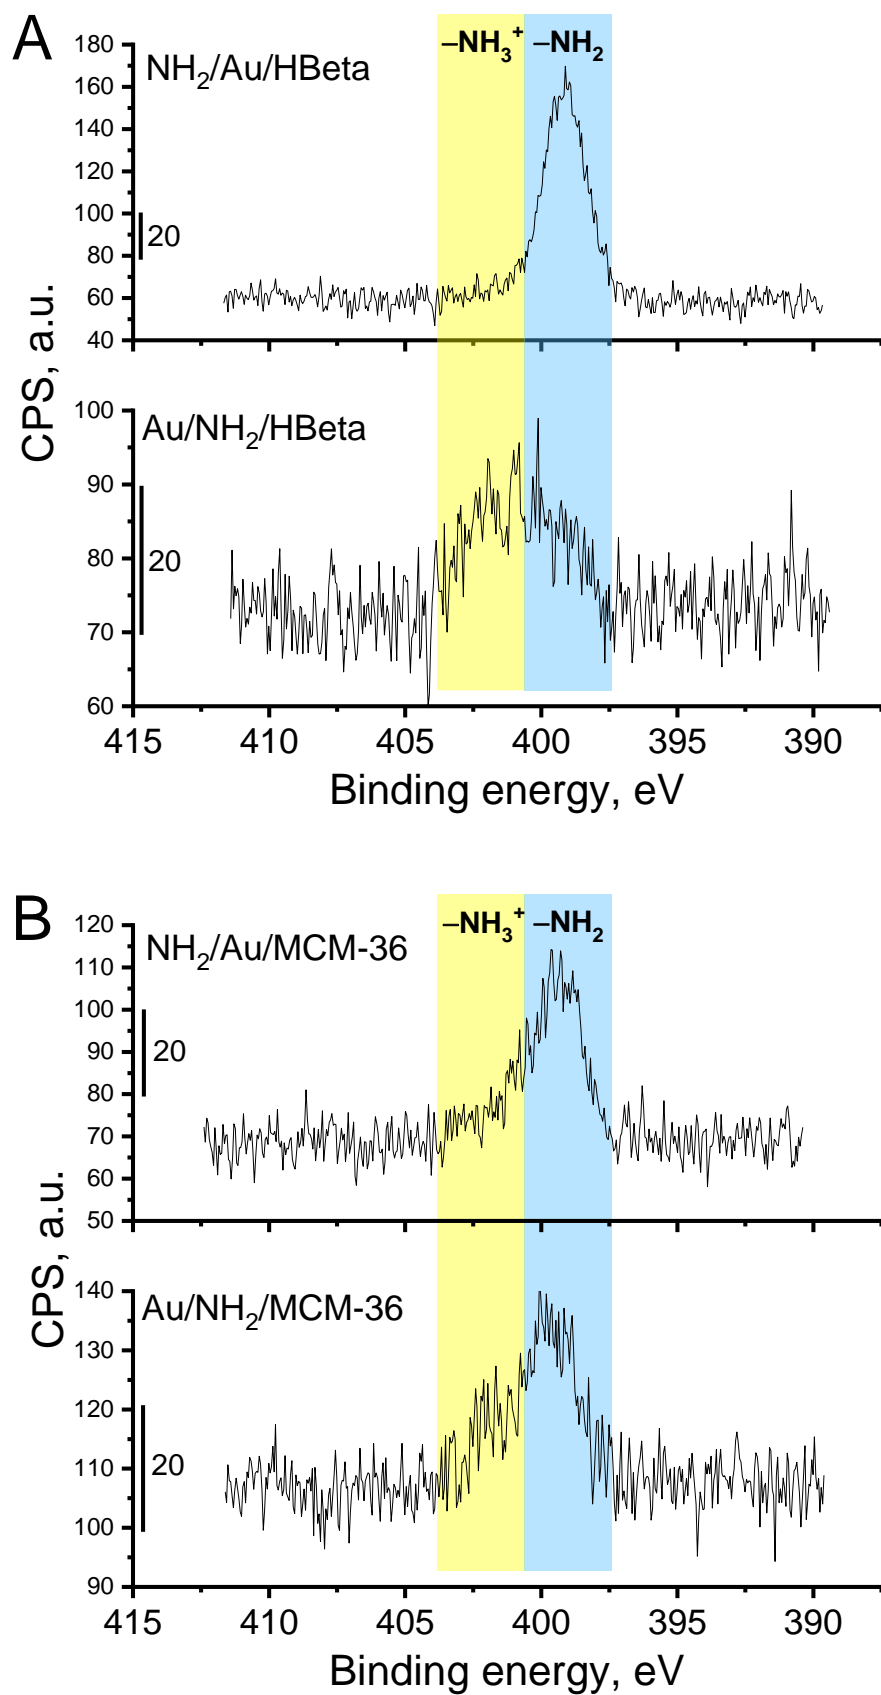

**Figure S5.** N 1s region of XP spectra of gold-containing zeolites for (A) HBeta; (B) MCM-36 series. The regions of BE values typical to the protonated and non-protonated amine groups [Graf et al. *Surf. Sci.* **2009**, 603, 2849–2860, doi:10.1016/j.susc.2009.07.029] are marked in yellow and blue, respectively.
